# Supplementary material for: A study on demagnetization heat treatment of waste neodymium iron boron (NdFeB) magnets by using computer simulation
Source: PeerJ journal article supplement (doi:10.7717/peerj-matsci.28), 2023-05-02
Supplement: simulation_data_sheet.xlsx [file simulation_data_sheet.xlsx]

## Sheet: 100
	Air			Furnace	Magnet	N2			Furnace	Magnet
Time	Measure	Simulation	Magnet	Deviation	Deviation	Measure	Simulation	Magnet	Deviation	Deviation
0	17	16.5	16.5	0.5	0	20	20.05	20.05	-0.05	0
1	17	16.8546	16.5303	0.14541	0.32424	25	23.9646	20.3261	1.03544	3.63847
2	17	16.8646	16.5624	0.13538	0.30226	25.5	24.3819	20.6957	1.11814	3.68614
3	17	16.8739	16.5936	0.12612	0.28026	25.5	24.412	21.0819	1.088	3.33011
4	17	16.8825	16.6232	0.11746	0.25938	26	24.8951	21.457	1.10494	3.43802
5	18	17.5967	16.6812	0.40332	0.91543	27	25.7431	21.8482	1.2569	3.89487
6	19.5	18.8045	16.8162	0.69547	1.98837	28	26.6157	22.2812	1.38428	4.33451
7	22.5	21.3383	17.0938	1.1617	4.24446	31.5	29.5664	22.8146	1.93363	6.75181
8	27	25.3322	17.6153	1.6678	7.71691	36	33.3086	23.5835	2.69144	9.72508
9	33.5	31.2505	18.5019	2.24955	12.7485	42.5	39.1277	24.7021	3.37226	14.4256
10	44.5	41.3999	19.993	3.10009	21.4069	51.5	47.2639	26.3376	4.23607	20.9264
11	49	45.8446	22.0576	3.15543	23.787	56	51.5135	28.5149	4.48649	22.9986
12	55	51.4985	24.4743	3.50149	27.0242	62.5	57.3716	31.0501	5.12842	26.3215
13	62	58.1192	27.2835	3.8808	30.8357	68	62.4376	33.9466	5.56244	28.4909
14	68	63.8548	30.4687	4.14515	33.3862	73.5	67.445	37.1354	6.05499	30.3096
15	73	68.6613	33.9254	4.33866	34.7359	78.5	72.1025	40.5667	6.39745	31.5358
16	78	73.4509	37.5759	4.54906	35.875	82	75.4487	44.148	6.55128	31.3007
17	81.5	76.8717	41.3336	4.62835	35.538	85.5	78.8082	47.7699	6.69181	31.0383
18	84.5	79.7956	45.0903	4.70439	34.7053	88	81.3409	51.3783	6.65913	29.9625
19	87.5	82.7292	48.8046	4.77078	33.9246	90.5	83.8947	54.9066	6.60534	28.9881
20	89.5	84.7622	52.4308	4.73777	32.3314	92.5	85.917	58.332	6.58301	27.585
21	91	86.3211	55.9048	4.67891	30.4163	93.5	86.9656	61.6086	6.53442	25.357
22	93	88.3191	59.2253	4.68093	29.0938	94.5	88.0108	64.6841	6.4892	23.3267
23	94	89.4324	62.3838	4.56764	27.0486	96	89.5078	67.5683	6.49216	21.9395
24	95	90.5018	65.349	4.49816	25.1529	96	89.6427	70.2721	6.35727	19.3707
25	95.5	91.137	68.1119	4.36302	23.0251	96.5	90.2847	72.7394	6.21529	17.5453
26	96	91.775	70.6652	4.22501	21.1098	97	90.8279	74.9994	6.17214	15.8284
27	96.5	92.412	73.0244	4.08795	19.3877	97.5	91.4935	77.0746	6.00646	14.419
28	96.5	92.6122	75.1878	3.88777	17.4245	97.5	91.7843	78.9709	5.7157	12.8134
29	97	93.2254	77.1696	3.77464	16.0558	97	91.5661	80.6647	5.43389	10.9014
30	97.5	93.8477	79.0063	3.65227	14.8414	97	91.7166	82.1547	5.28336	9.56197
31	97.5	94.04	80.696	3.46	13.344	97	91.974	83.4805	5.026	8.49355
32	97.5	94.216	82.2312	3.28405	11.9847	97	92.1884	84.6642	4.81164	7.52418
33	97.5	94.3735	83.6231	3.12649	10.7504	97	92.3868	85.7226	4.61316	6.66423
34	97.5	94.546	84.8842	2.95398	9.66185	98	93.3359	86.6966	4.66413	6.6393
35	97.5	94.7291	86.0268	2.77086	8.70236	98	93.5466	87.6243	4.4534	5.92227
36	97.5	94.8934	87.0632	2.60663	7.83014	99	94.4709	88.496	4.52908	5.97488
37	98	95.45	88.0231	2.55002	7.42689	99	94.6481	89.3366	4.3519	5.31148
38	98.5	95.6052	88.9168	2.89476	6.6884	99	94.7748	90.1042	4.22519	4.6706
39	98.5	96.1579	89.7516	2.34209	6.40634	99.5	95.3002	90.809	4.19982	4.49117
40	98.5	96.3154	90.5332	2.1846	5.78215	99.5	95.4485	91.4694	4.05145	3.97919
41	99.5	97.2368	91.2856	2.26318	5.9512	99.5	95.5919	92.0679	3.90814	3.52395
42	99.5	97.4022	92.0144	2.0978	5.38779	99.5	95.6989	92.6058	3.80113	3.09306
43	99.5	97.5444	92.6844	1.95563	4.85995	99.5	95.802	93.0877	3.69798	2.71432
44	100	98.0557	93.3147	1.9443	4.74096	99.5	95.8904	93.5191	3.60964	2.37125
45	100.5	98.5785	93.929	1.92147	4.64949	99.5	95.9668	93.9055	3.53318	2.06134
46	100.5	98.7246	94.5129	1.77542	4.2117	99.5	96.0347	94.2513	3.46529	1.78345
47	101	99.2241	95.0671	1.77592	4.15702	100.5	96.8359	94.589	3.66408	2.24695
48	101	99.3719	95.5939	1.6281	3.77802	100.5	96.9444	94.9478	3.55562	1.99657
49	101	99.4827	96.0766	1.51733	3.40606	100.5	97.025	95.2828	3.47499	1.74219
50	100	98.8856	96.4788	1.11441	2.40678	100.5	97.0876	95.5866	3.4124	1.50105
51	100	98.9486	96.8007	1.05143	2.14786	100.5	97.1349	95.8596	3.36511	1.27525
52	100	99.0233	97.0854	0.97674	1.93791	100.5	97.1835	96.1044	3.31646	1.07918
53	100	99.091	97.341	0.90895	1.75007	100.5	97.2275	96.3235	3.27251	0.90401
54	100	99.1611	97.572	0.83889	1.58907	100.5	97.2645	96.5195	3.23547	0.74503
55	100	99.2206	97.7814	0.77939	1.43921	100.5	97.2845	96.695	3.21545	0.58959
56	100	99.2805	97.9713	0.71947	1.3092	100.5	97.3373	96.8521	3.16271	0.4852
57	100	99.3375	98.1437	0.66247	1.19383	100.5	97.3549	96.9928	3.1451	0.36214
58	100	99.3904	98.3002	0.60959	1.09024	100.5	97.3909	97.1188	3.10914	0.27204
59	100	99.4381	98.4422	0.56191	0.99587	100.5	97.4159	97.2319	3.08412	0.184
60	100	99.4818	98.5712	0.51821	0.91059	100.5	97.4277	97.3333	3.07228	0.0944
61	100	99.5214	98.6883	0.4786	0.83306	100.5	97.4572	97.4244	3.04279	0.03281
62	100	99.5572	98.7947	0.44279	0.76249	100.5	97.4772	97.5062	3.02277	-0.02896
63	100	99.5928	98.8914	0.40718	0.70146	100.5	97.4872	97.5797	3.01279	-0.09244
64	100	99.6227	98.9792	0.37729	0.64353	100.5	97.4967	97.6457	3.00327	-0.14898
65	100	99.6512	99.059	0.34879	0.59223	100.5	97.5313	97.7052	2.96874	-0.17393
66	100	99.6766	99.1315	0.32342	0.54506	100.5	97.5356	97.7587	2.96437	-0.22307
67	100	99.6997	99.1975	0.30025	0.50227	100.5	97.552	97.807	2.94795	-0.25493
68	100	99.722	99.2575	0.27796	0.46457	100.5	97.5512	97.8505	2.94879	-0.29925
69	100	99.7413	99.312	0.25867	0.42931	100.5	97.5652	97.8898	2.93476	-0.32456
70	100	99.7589	99.3617	0.24114	0.3972	100.5	97.587	97.9254	2.91297	-0.33838
71	100	99.7749	99.4068	0.22506	0.3681	100.5	97.5911	97.9577	2.90893	-0.36661
72	100	99.7912	99.448	0.20881	0.34322	100.5	97.603	97.987	2.89698	-0.38402
73	100	99.8043	99.4854	0.19574	0.31885	100.5	97.6049	98.0138	2.89514	-0.40895
74	100	99.8158	99.5195	0.1842	0.29626	100.5	97.5968	98.0379	2.90323	-0.44117
75	100	99.8269	99.5506	0.17313	0.27623	100.5	97.6215	98.0601	2.87846	-0.43851
76	100	99.8377	99.579	0.1623	0.25871	100.5	97.6303	98.0803	2.86971	-0.44997
77	100	99.8474	99.6049	0.15257	0.24256	100.5	97.636	98.0989	2.86402	-0.46288
78	100	99.8563	99.6285	0.14371	0.22779	100.5	97.6436	98.1159	2.85644	-0.47233
79	100	99.8648	99.6501	0.13524	0.21468	100.5	97.6515	98.1315	2.84848	-0.47994
80	100	99.8722	99.6698	0.12776	0.20243	100.5	97.6642	98.1458	2.83583	-0.48164
81	100	99.8791	99.6879	0.12093	0.19119	100.5	97.6596	98.159	2.84037	-0.49942
82	100	99.8855	99.7044	0.11452	0.18105	100.5	97.6677	98.1712	2.83227	-0.50349
83	100	99.8908	99.7196	0.10922	0.17119	100.5	97.6709	98.1824	2.82907	-0.51144
84	100	99.8962	99.7335	0.10382	0.16268	100.5	97.6754	98.1928	2.82464	-0.51748
85	100	99.9008	99.7463	0.09918	0.15456	100.5	97.6788	98.2026	2.82116	-0.52374
86	100	99.9052	99.758	0.09475	0.14729	100.5	97.6869	98.2116	2.81314	-0.52477
87	100	99.9093	99.7687	0.09072	0.14057	100.5	97.6913	98.22	2.80872	-0.52871
88	100	99.9133	99.7795	0.08669	0.13384	100.5	97.6942	98.228	2.80575	-0.53376
89	100	99.9173	99.7902	0.08266	0.12711	100.5	97.7072	98.2357	2.79283	-0.52849
90	100	99.9214	99.801	0.07863	0.12039	100.5	97.7034	98.2428	2.79663	-0.53943

## Sheet: 200
	Air			Furnace	Magnet	N2			Furnace	Magnet
Time	Measure	Simulation	Magnet	Deviation	Deviation	Measure	Simulation	Magnet	Deviation	Deviation
0	16.5	16.5	16.5	0	0	22	20.05	20.05	1.95	0
1	16.5	16.5	16.5	0	0	22	21.4308	20.1526	0.56917	1.27821
2	16.5	16.5	16.5	0	0	24	23.1322	20.3354	0.86784	2.79672
3	16.5	16.5	16.5	0	0	24	23.151	20.6061	0.849	2.54488
4	16.5	16.5	16.5	0	0	24	23.213	20.8793	0.78696	2.33369
5	17.5	17.1781	16.5194	0.32191	0.65867	24	23.2885	21.1348	0.71155	2.15368
6	19.5	18.7567	16.616	0.7433	2.14069	25	24.0759	21.3918	0.92408	2.68411
7	23.5	22.1645	16.8772	1.33548	5.28737	27	25.7323	21.7181	1.26772	4.01422
8	28	26.2311	17.4041	1.76894	8.82694	31	29.1086	22.2096	1.89138	6.89903
9	35	32.6219	18.2844	2.37814	14.3375	37	34.1029	23.0092	2.89706	11.0937
10	43.5	40.5363	19.6695	2.96369	20.8668	42	38.7409	24.2063	3.25915	14.5346
11	52	48.5447	21.6528	3.4553	26.8919	50	45.9496	25.8359	4.05037	20.1137
12	61.5	57.5044	24.2641	3.99557	33.2403	59.5	54.5111	28.0636	4.98891	26.4474
13	71.5	66.9627	27.5466	4.53726	39.4162	68	62.1578	30.9509	5.84225	31.2069
14	81	75.97	31.4964	5.02996	44.4737	79.5	72.3615	34.5092	7.13854	37.8523
15	91	85.4109	36.0677	5.58907	49.3432	88.5	80.8027	38.7931	7.6973	42.0095
16	101.5	95.2967	41.2537	6.20332	54.0429	100	91.3614	43.7351	8.63858	47.6263
17	111.5	104.769	47.0323	6.73064	57.7371	108.5	99.3895	49.3059	9.11049	50.0836
18	121.5	114.238	53.3368	7.26185	60.9014	119.5	109.494	55.3728	10.0057	54.1214
19	131.5	123.693	60.116	7.80719	63.5768	129	118.414	61.9625	10.5863	56.4511
20	141.5	133.138	67.3249	8.36213	65.813	139	127.755	68.9774	11.2447	58.7779
21	152	143.05	74.9393	8.95011	68.1106	149.5	137.372	76.4094	12.1275	60.9631
22	162	152.516	82.938	9.4845	69.5775	158.5	145.835	84.2086	12.6653	61.6261
23	171	161.08	91.2331	9.91971	69.8472	168.5	155.122	92.2778	13.3778	62.8444
24	180	169.613	99.7252	10.3872	69.8877	176	162.296	100.563	13.7041	61.7332
25	186.5	175.958	108.299	10.5423	67.6586	183.5	169.426	108.879	14.0737	60.5468
26	192.5	181.832	116.76	10.6678	65.0725	189	174.867	117.123	14.133	57.7438
27	197	186.381	124.99	10.6194	61.3903	194	179.644	125.143	14.3557	54.5009
28	200	189.542	132.845	10.4581	56.6972	197	182.671	132.844	14.3291	49.8267
29	202.5	192.317	140.215	10.1829	52.102	199.5	185.231	140.07	14.2692	45.1607
30	204.5	194.609	147.069	9.89057	47.5407	198.5	187.388	146.779	11.1125	40.6081
31	206	196.459	153.393	9.541	43.0658	199.5	188.688	152.931	10.8122	35.7566
32	206.5	197.429	159.171	9.0713	38.2579	201	190.581	158.516	10.4195	32.0648
33	207.5	198.737	164.401	8.76289	34.3365	201	191.401	163.56	9.59871	27.8414
34	207.5	199.248	169.126	8.25182	30.1226	201.5	192.488	168.042	9.0116	24.4465
35	207.5	199.785	173.338	7.7151	26.4465	201.5	193.074	172.021	8.4261	21.0534
36	208	200.721	177.098	7.27919	23.6228	201.5	193.706	175.522	7.79422	18.1834
37	207.5	200.84	180.456	6.66038	20.3834	201.5	194.315	178.597	7.18516	15.718
38	207.5	201.293	183.418	6.20689	17.8746	201.5	194.852	181.294	6.6475	13.5581
39	207	201.365	186.034	5.63512	15.3314	201	194.929	183.644	6.07066	11.2852
40	207	201.816	188.329	5.18386	13.4869	200.5	194.92	185.653	5.58045	9.26631
41	206	201.521	190.335	4.4793	11.1858	200.5	195.25	187.371	5.25044	7.87862
42	206	201.888	192.056	4.11174	9.83186	200.5	195.53	188.864	4.97015	6.66599
43	205	201.516	193.542	3.48352	7.97405	200.5	195.819	190.168	4.68146	5.65067
44	205	201.794	194.798	3.20647	6.99512	200.5	196.028	191.309	4.47198	4.71853
45	204	201.356	195.869	2.64391	5.48733	200.5	196.196	192.31	4.30422	3.88586
46	204	201.565	196.754	2.43547	4.81029	201	196.754	193.203	4.24644	3.55031
47	203	201.111	197.494	1.88944	3.6162	201	196.953	194.02	4.0466	2.9338
48	202	200.617	198.057	1.38325	2.55971	201.5	197.472	194.76	4.02793	2.71207
49	202	200.728	198.479	1.27161	2.24965	201.5	197.63	195.445	3.87039	2.1843
50	201	200.207	198.804	0.79344	1.40293	202	198.127	196.072	3.87272	2.05532
51	200	199.634	198.997	0.36623	0.63725	202	198.267	196.658	3.73284	1.60928
52	200	199.642	199.089	0.35812	0.55252	202	198.372	197.181	3.62787	1.19134
53	199	199.062	199.122	-0.06218	-0.05997	202	198.462	197.642	3.53755	0.82079
54	199	199.024	199.085	-0.02369	-0.06089	202	198.552	198.047	3.448	0.50531
55	200	199.6	199.062	0.39984	0.5382	202	198.621	198.402	3.37886	0.21878
56	201	200.262	199.127	0.73823	1.13515	202	198.681	198.715	3.31948	-0.03465
57	201	200.339	199.26	0.66111	1.07912	202	198.75	198.991	3.25007	-0.24064
58	201	200.386	199.399	0.61394	0.98733	202	198.804	199.233	3.19601	-0.42889
59	202	201.068	199.558	0.93211	1.51023	202	198.856	199.446	3.14403	-0.59033
60	202	201.164	199.762	0.83641	1.40125	202	198.897	199.634	3.10344	-0.73775
61	202	201.237	199.961	0.76346	1.27507	201	198.153	199.766	2.84725	-1.6136
62	203	201.939	200.173	1.06083	1.76652	201	198.157	199.815	2.84262	-1.65791
63	202	201.414	200.394	0.58644	1.01923	201	198.165	199.843	2.83512	-1.67802
64	202	201.446	200.547	0.55397	0.89858	201	198.177	199.864	2.82309	-1.68672
65	202	201.491	200.673	0.50857	0.81867	201	198.193	199.881	2.80693	-1.68835
66	201	200.921	200.753	0.07851	0.16884	201	198.208	199.898	2.79232	-1.69022
67	201	200.901	200.762	0.0988	0.13939	201	198.219	199.914	2.78115	-1.69498
68	201	200.897	200.754	0.1034	0.14273	201	198.232	199.929	2.76847	-1.69784
69	201	200.891	200.743	0.10902	0.14836	201	198.243	199.944	2.75701	-1.70147
70	201	200.887	200.732	0.11252	0.1559	201	198.261	199.959	2.73919	-1.6986
71	200	200.284	200.693	-0.2842	-0.40876	201	198.271	199.974	2.72929	-1.70327
72	200	200.223	200.598	-0.22339	-0.37493	201	198.285	199.988	2.7148	-1.70276
73	200	200.183	200.499	-0.18285	-0.31598	201	198.295	200.002	2.70512	-1.70665
74	201	200.751	200.435	0.24867	0.31594	201	198.307	200.015	2.69252	-1.70721
75	201	200.777	200.439	0.22319	0.33793	200	198.322	200.028	2.67789	-1.70552
76	201	200.785	200.458	0.21451	0.32745	200	198.33	200.04	2.66953	-1.70961
77	201	200.795	200.48	0.20525	0.31474	200	198.336	200.052	2.66401	-1.71609
78	201	200.805	200.502	0.19506	0.30336	200	198.353	200.063	2.64669	-1.71007
79	201	200.811	200.522	0.18883	0.28942	200	198.353	200.074	2.64695	-1.72131
80	201	200.818	200.54	0.18152	0.27816	200	198.382	200.085	2.6177	-1.70249
81	201	200.824	200.557	0.17559	0.26705	199	198.39	200.096	2.60953	-1.70519
82	201	200.831	200.573	0.16937	0.25762	199	198.398	200.107	2.60246	-1.70899
83	201	200.836	200.587	0.16419	0.24841	199	198.405	200.117	2.59531	-1.71245
84	201	200.841	200.601	0.15851	0.24082	199	197.628	200.094	3.37192	-2.46545
85	201	200.846	200.613	0.15371	0.23335	199	197.6	200.006	3.40042	-2.4067
86	201	200.851	200.624	0.14908	0.22664	199	197.583	199.914	3.41736	-2.33177
87	201	200.855	200.635	0.1455	0.21971	199	197.579	199.83	3.42095	-2.25048
88	201	200.858	200.645	0.1455	0.20921	199	197.573	199.754	3.42748	-2.18186
89	201	200.862	200.656	0.1455	0.1987	199	197.568	199.689	3.43248	-2.12187
90	201	200.865	200.666	0.1455	0.18819	199	197.564	199.633	3.43626	-2.06972

## Sheet: 300
	Air			Furnace	Magnet	N2			Furnace	Magnet
Time	Measure	Simulation	Magnet	Deviation	Deviation	Measure	Simulation	Magnet	Deviation	Deviation
0	17	16.5	16.5	0.5	0	22	20.05	20.05	1.95	1.95
1	17.75	17.3843	16.5532	0.36568	0.83115	22	21.4701	20.0525	0.52994	1.94753
2	17.75	17.4366	16.6327	0.3134	0.80394	22	21.4711	20.0626	0.52894	1.9374
3	17.75	17.4568	16.7124	0.29317	0.74448	22	21.4873	20.081	0.51267	1.91902
4	17.75	17.4757	16.7883	0.27427	0.68748	22	21.5124	20.1073	0.48759	1.89274
5	18.75	18.2319	16.8899	0.5181	1.34203	23	22.3582	20.1409	0.64178	2.85914
6	20.75	19.8713	17.0813	0.87872	2.79	25	23.9333	20.1812	1.06673	4.8188
7	23.75	22.4707	17.4308	1.27926	5.03991	27.5	26.1022	20.2932	1.39781	7.20676
8	28.5	26.7079	18.032	1.79215	8.67585	31.5	29.468	20.6415	2.03198	10.8585
9	34.25	31.9944	18.9812	2.25558	13.0132	37.5	34.5338	21.3498	2.9662	16.1502
10	42	39.1771	20.3939	2.82287	18.7833	46	42.1142	22.5282	3.88582	23.4718
11	50.75	47.3786	22.3852	3.37137	24.9934	53.5	48.9707	24.3168	4.52927	29.1832
12	59.75	55.8799	25.0054	3.8701	30.8745	62.5	56.95	26.7896	5.54997	35.7104
13	68.5	64.1701	28.2412	4.32991	35.9289	72	65.4349	29.9818	6.5651	42.0182
14	78.5	73.6114	32.0996	4.88865	41.5117	81.5	74.0203	33.8835	7.47967	47.6165
15	88.25	82.8409	36.5924	5.40906	46.2485	91.5	83.2893	38.4796	8.21073	53.0204
16	98.25	92.2734	41.6845	5.97658	50.5889	102	92.9844	43.7349	9.01556	58.2651
17	108.25	101.713	47.346	6.53732	54.3667	111	101.293	49.6164	9.70669	61.3836
18	118.25	111.179	53.5338	7.07148	57.6448	121	110.546	55.968	10.4542	65.032
19	128.25	120.643	60.2043	7.60675	60.4389	130.5	119.48	62.8177	11.0199	67.6823
20	138.25	130.094	67.3146	8.15582	62.7796	140.5	128.792	70.0717	11.7078	70.4283
21	147.25	138.661	74.7802	8.58894	63.8809	149.5	137.305	77.6529	12.1954	71.8471
22	157.5	148.326	82.5669	9.17353	65.7596	159.5	146.524	85.514	12.9762	73.986
23	167.5	157.795	90.6935	9.70451	67.102	170	156.469	93.7444	13.5313	76.2556
24	177.5	167.263	99.1243	10.2371	68.1386	178.5	164.614	102.254	13.8856	76.2459
25	186.5	175.813	107.784	10.6868	68.0292	187.5	173.091	110.951	14.4089	76.5486
26	196.5	185.273	116.641	11.2268	68.6323	197	181.888	119.787	15.1119	77.2133
27	205.75	194.073	125.687	11.6771	68.3863	206.5	190.712	128.808	15.7879	77.6917
28	215.75	203.518	134.902	12.2321	68.6161	216	199.414	137.984	16.5857	78.0158
29	225.75	213.017	144.307	12.7333	68.7099	226.5	209.17	147.301	17.3302	79.1992
30	235.75	222.504	153.884	13.2465	68.6198	235.5	217.608	156.806	17.8924	78.694
31	245.75	232.063	163.617	13.6867	68.446	245	226.477	166.469	18.5231	78.5312
32	255	241.004	173.453	13.9955	67.5517	254	234.9	176.262	19.1	77.7382
33	265	250.536	183.368	14.4635	67.1684	264.5	244.615	186.135	19.8846	78.3652
34	275	260.123	193.389	14.8767	66.7346	273.5	253.066	196.104	20.4339	77.3958
35	283.25	268.231	203.415	15.0192	64.8156	282	261.304	206.112	20.6957	75.8876
36	292.25	276.966	213.379	15.2839	63.5875	289.5	268.668	216.027	20.8324	73.4726
37	299.25	283.978	223.207	15.2722	60.7713	295	274.381	225.827	20.6186	69.1725
38	298	283.947	232.344	14.0533	51.6027	300	279.764	235.079	20.2363	64.9213
39	302	288.366	240.607	13.6337	47.7588	304	284.483	243.376	19.5172	60.6239
40	305	291.851	248.278	13.1495	43.5726	305.5	287.267	251.014	18.233	54.4864
41	306.5	294.184	255.308	12.3163	38.876	306.5	289.183	257.983	17.3172	48.5171
42	308.5	296.771	261.707	11.7288	35.0638	307	290.742	264.263	16.2576	42.7371
43	309	298.16	267.491	10.8401	30.6685	306.5	291.423	269.888	15.0772	36.6122
44	309.5	299.472	272.644	10.0278	26.8283	307	292.705	274.856	14.2954	32.1444
45	309.5	300.424	277.203	9.07611	23.2213	307	296.44	279.217	13.5595	27.7829
46	309.5	301.372	281.206	8.12784	20.1662	306.5	296.657	282.978	12.8433	23.5225
47	309	301.793	284.689	7.20736	17.1032	306	296.794	286.188	12.2055	19.8119
48	309	302.495	287.711	6.50453	14.7845	306	297.232	288.901	11.7679	17.0993
49	308.5	302.814	290.323	5.68613	12.4911	305	296.853	291.201	11.1465	13.799
50	308	302.992	292.548	5.00829	10.4434	305	297.167	293.125	10.8333	11.8753
51	308	303.513	294.457	4.48716	9.05581	304.5	297.045	294.732	10.4546	9.76809
52	307	303.291	296.065	3.70898	7.22595	304.5	297.298	296.055	10.2022	8.44473
53	307	303.692	297.407	3.30776	6.28563	304	297.1	297.102	9.89985	6.89788
54	307	304.055	298.567	2.9446	5.4887	304	297.254	297.982	9.74635	6.01829
55	306.5	304.015	299.549	2.48472	4.46587	304	297.351	298.74	9.64906	5.25997
56	306	303.928	300.349	2.07183	3.57868	304	297.452	299.317	9.54822	4.68265
57	306	304.145	301.012	1.85505	3.13278	304	297.57	299.753	9.4302	4.24738
58	306	304.346	301.584	1.65387	2.76252	304	297.667	300.11	9.33286	3.89009
59	306	304.523	302.08	1.47705	2.44287	304	297.749	300.426	9.25102	3.57362
60	306	304.68	302.512	1.3203	2.16737	304	297.814	300.693	9.18563	3.30719
61	306	304.819	302.889	1.18099	1.93003	304	297.885	300.922	9.11529	3.0782
62	306	304.938	303.217	1.06219	1.72037	304	297.901	301.119	9.09933	2.88146
63	306	305.043	303.504	0.95714	1.53861	304	297.967	301.273	9.03256	2.72721
64	306	305.132	303.755	0.86775	1.37723	303.5	297.633	301.402	8.86677	2.0981
65	306	305.213	303.975	0.78711	1.23837	303.5	297.616	301.53	8.88446	1.97044
66	306	305.289	304.167	0.7114	1.12153	303.5	297.655	301.633	8.84479	1.86691
67	306	305.35	304.336	0.64969	1.01414	303	297.282	301.723	8.71791	1.27684
68	305.5	305.094	304.458	0.40637	0.63532	303	297.303	301.784	8.69744	1.21613
69	305.5	305.114	304.536	0.38553	0.57897	303	297.303	301.797	8.69691	1.20336
70	305.5	305.138	304.598	0.36244	0.53935	303	297.321	301.793	8.679	1.20702
71	304.5	304.547	304.605	-0.04695	-0.05789	303	297.323	301.755	8.67748	1.24523
72	304.5	304.507	304.559	-0.0069	-0.05171	303	297.343	301.641	8.65744	1.35873
73	304.5	304.482	304.498	0.01817	-0.01595	303	297.362	301.523	8.63757	1.47691
74	304.5	304.459	304.44	0.04078	0.01924	303	297.391	301.42	8.60874	1.58017
75	304.5	304.439	304.389	0.06052	0.05085	303	297.399	301.333	8.60149	1.66738
76	304.5	304.423	304.344	0.07701	0.07881	303	297.424	301.258	8.57613	1.74207
77	304.5	304.409	304.306	0.09138	0.10245	303	297.435	301.192	8.56488	1.80793
78	304.5	304.397	304.274	0.10303	0.12306	303	297.453	301.134	8.54717	1.86569
79	304.5	304.387	304.247	0.11251	0.1407	303	297.47	301.09	8.53005	1.91025
80	304.5	304.379	304.224	0.12083	0.1549	303	297.499	301.052	8.50073	1.94783
81	304.5	304.373	304.206	0.12729	0.1671	303	297.491	301.02	8.5092	1.98001
82	304.5	304.368	304.19	0.13217	0.17767	303	297.51	300.995	8.48988	2.00507
83	304.5	304.363	304.177	0.13691	0.18564	303	297.53	300.971	8.47024	2.02879
84	304.5	304.359	304.167	0.14081	0.19207	303	297.55	300.95	8.4499	2.05016
85	303.5	303.75	304.132	-0.24987	-0.38196	303	297.573	300.901	8.42714	2.09876
86	303.5	303.688	304.03	-0.18825	-0.34176	302	296.811	300.777	8.18922	1.22283
87	303.5	303.644	303.921	-0.14412	-0.27677	302	296.769	300.651	8.23115	1.34897
88	303.5	303.6	303.812	-0.09999	-0.21177	302	296.774	300.546	8.22635	1.45354
89	302.5	303.556	303.703	-1.05586	-0.14678	302	296.771	300.409	8.22925	1.59063
90	302.5	303.512	303.594	-1.01173	-0.08178	302	296.773	300.22	8.2271	1.7804

## Sheet: 400
	Air			Furnace	Magnet	N2			Furnace	Magnet
Time	Measure	Simulation	Magnet	Deviation	Deviation	Measure	Simulation	Magnet	Deviation	Deviation
0	19	16.5	16.5	2.5	0	24	20.05	20.05	3.95	0
1	19	18.4234	16.6535	0.57655	1.76994	24	23.1744	20.2595	0.82556	2.9149
2	19	18.4589	16.8168	0.54115	1.64206	25	23.9006	20.5645	1.09937	3.33609
3	19	18.491	16.9763	0.50899	1.51469	25	24.0507	20.9121	0.94927	3.13859
4	19	18.5212	17.1268	0.47875	1.39443	25	24.1036	21.2475	0.89636	2.8561
5	20	19.3218	17.2978	0.67821	2.02401	26	24.929	21.5797	1.07102	3.34932
6	22.5	21.4166	17.5698	1.08344	3.84677	28.5	27.0134	21.9859	1.48661	5.0275
7	25.5	24.0779	18.0143	1.42211	6.06364	32.5	30.3968	22.5749	2.10323	7.82187
8	29	27.2516	18.668	1.74844	8.58352	37.5	34.5676	23.4497	2.93244	11.1179
9	36.5	34.0566	19.6782	2.44344	14.3783	44	40.5187	24.7053	3.48133	15.8133
10	42.5	39.7257	21.1543	2.77427	18.5715	52	47.7684	26.4548	4.23158	21.3137
11	52	48.5624	23.1674	3.43756	25.395	60.5	55.4581	28.788	5.04192	26.6701
12	60.5	56.6219	25.8134	3.87813	30.8085	70.5	64.3137	31.7616	6.18625	32.5521
13	69.5	65.1323	29.0624	4.36772	36.0699	80.5	73.3632	35.4385	7.13684	37.9246
14	79	74.1109	32.9225	4.88906	41.1884	89.5	81.7034	39.7773	7.7966	41.926
15	89	83.5558	37.4035	5.44416	46.1523	99.5	91.006	44.6918	8.49404	46.3141
16	99	92.9847	42.4935	6.01535	50.4912	109.5	100.322	50.1846	9.17801	50.1374
17	109	102.432	48.1541	6.56776	54.2782	119.5	109.6	56.217	9.90027	53.3827
18	119	111.892	54.3419	7.1076	57.5505	129.5	118.921	62.7468	10.5787	56.1745
19	129.5	121.805	61.0342	7.69493	60.7709	139.5	128.163	69.7261	11.3372	58.4367
20	139.5	131.269	68.1922	8.23079	63.077	149.5	137.392	77.1151	12.108	60.277
21	150	141.189	75.7734	8.81056	65.416	159.5	146.735	84.8771	12.7648	61.8581
22	162	152.45	83.8312	9.54992	68.6189	170.5	157.016	93.0064	13.4844	64.0092
23	170	160.169	92.2289	9.83071	67.9403	180	165.877	101.487	14.1231	64.39
24	180	169.598	100.813	10.4024	68.7842	189	174.375	110.184	14.6246	64.1915
25	190	179.072	109.645	10.9277	69.4274	199.5	184.119	119.067	15.3814	65.0518
26	199.5	188.105	118.686	11.3951	69.4186	208.5	192.499	128.161	16.0007	64.3387
27	209.5	197.579	127.914	11.9206	69.6649	218.5	201.816	137.395	16.6844	64.4207
28	219.5	207.044	137.335	12.4556	69.709	229.5	211.823	146.838	17.6773	64.9849
29	229.5	216.551	146.93	12.949	69.6206	238.5	220.155	156.485	18.3454	63.6693
30	239.5	226.055	156.679	13.4451	69.376	249	229.822	166.246	19.1776	63.5762
31	250	236.067	166.592	13.9332	69.4751	258	238.28	176.14	19.72	62.1398
32	260	245.632	176.656	14.3677	68.9765	267.5	247.074	186.065	20.4255	61.0098
33	269.5	254.784	186.799	14.7158	67.9848	277.5	256.312	196.059	21.1883	60.2527
34	279.5	264.26	197.001	15.2397	67.2588	286.5	265.013	206.129	21.4869	58.8843
35	289.5	273.889	207.28	15.6115	66.6089	297	275.007	216.204	21.9927	58.8034
36	298.5	282.675	217.576	15.8245	65.0995	306.5	284.143	226.405	22.3571	57.7378
37	308.5	292.321	227.879	16.179	64.4422	315.5	292.847	236.607	22.653	56.2397
38	318	301.506	238.215	16.4939	63.2914	325	302.087	246.785	22.9134	55.3014
39	328.5	311.58	248.608	16.9204	62.9715	335	311.795	256.981	23.205	54.8142
40	337	320.071	258.998	16.9291	61.0726	344.5	321.152	267.232	23.3483	53.9198
41	346.5	329.285	269.322	17.2153	59.9626	353.5	330.125	277.474	23.375	52.6513
42	355.5	338.146	279.6	17.354	58.5461	362.5	339.174	287.65	23.326	51.5239
43	366	348.28	289.893	17.7199	58.3867	372	348.377	297.771	23.6228	50.6058
44	374	356.328	300.151	17.6717	56.1772	380.5	356.985	307.836	23.5145	49.1491
45	384	366.081	310.337	17.9188	55.7438	391	367.309	317.856	23.6914	49.4521
46	393	375.003	320.515	17.9974	54.4878	398	374.8	327.842	23.1996	46.958
47	401	383.218	330.571	17.7817	52.6476	405	382.171	337.537	22.8292	44.6334
48	401.5	385.259	339.995	16.241	45.2642	409.5	387.496	346.813	22.0041	40.6834
49	406.5	390.786	348.61	15.7144	42.1761	413	391.912	355.449	21.0879	36.4626
50	410	395.118	356.649	14.8824	38.4689	414.5	394.568	363.309	19.9324	31.2589
51	412.5	398.646	364.049	13.8538	34.5977	415.5	396.604	370.27	18.8962	26.3335
52	414	401.575	370.757	12.4254	30.8173	416	398.094	376.349	17.9058	21.7455
53	414	402.934	376.695	11.0664	26.2385	416	399.026	381.584	16.9741	17.4417
54	415	404.974	381.907	10.0265	23.0666	416	399.749	386.039	16.2513	13.7094
55	414	405.451	386.416	8.54926	19.0349	415.5	399.99	389.793	15.51	10.1972
56	414	406.315	390.245	7.68491	16.0701	414.5	399.758	392.881	14.7424	6.87702
57	413.5	406.876	393.503	6.62392	13.3734	414	399.774	395.372	14.2265	4.40121
58	412.5	406.973	396.209	5.52717	10.7642	413	399.347	397.368	13.6529	1.97912
59	411.5	406.965	398.401	4.53503	8.56385	412	398.853	398.907	13.1468	-0.05407
60	411	407.179	400.174	3.82058	7.00525	412	399.024	400.095	12.9765	-1.07165
61	410.5	407.314	401.618	3.18644	5.6955	411	398.404	401.027	12.5957	-2.6232
62	410	407.36	402.784	2.63973	4.57622	410.5	398.129	401.7	12.3714	-3.57183
63	410	407.681	403.742	2.31909	3.93856	413.5	400.59	402.332	12.9102	-1.74183
64	409.5	407.647	404.527	1.85294	3.12022	410.5	398.449	402.979	12.0507	-4.52927
65	409	407.54	405.134	1.46031	2.40578	410	398.059	403.306	11.9414	-5.24742
66	409	407.702	405.614	1.2978	2.08845	410	398.105	403.495	11.8949	-5.39008
67	409	407.848	406.017	1.15153	1.83153	410	398.171	403.635	11.8289	-5.46397
68	409	407.977	406.36	1.0233	1.61653	410	398.211	403.749	11.7888	-5.53805
69	409	408.09	406.655	0.91047	1.43494	410	398.251	403.847	11.7492	-5.5957
70	409	408.183	406.908	0.81665	1.27572	409.5	397.898	403.91	11.6025	-6.01224
71	408.5	407.949	407.096	0.55083	0.85328	409.5	397.912	403.924	11.5884	-6.01205
72	408.5	407.993	407.225	0.50729	0.76767	409.5	397.941	403.928	11.5586	-5.98705
73	408.5	408.032	407.331	0.46801	0.70097	409.5	397.972	403.933	11.5276	-5.96053
74	408	407.756	407.391	0.24376	0.36476	409	397.599	403.918	11.4007	-6.31822
75	408	407.756	407.41	0.24424	0.34533	409	397.616	403.865	11.384	-6.24928
76	408	407.76	407.422	0.23978	0.33835	409	397.609	403.814	11.3909	-6.20487
77	408	407.765	407.431	0.23518	0.33376	409	397.634	403.77	11.3658	-6.13622
78	408	407.768	407.44	0.23236	0.3278	409	397.615	403.735	11.3847	-6.12004
79	407	407.156	407.412	-0.15634	-0.25595	408	396.86	403.665	11.14	-6.80526
80	407	407.098	407.314	-0.09824	-0.21595	408	396.848	403.524	11.1516	-6.67525
81	407	407.056	407.207	-0.05644	-0.15104	408	396.841	403.386	11.1594	-6.54551
82	407	407.021	407.111	-0.02053	-0.09037	408	396.833	403.267	11.1673	-6.43455
83	407	406.99	407.027	0.01022	-0.03749	407	396.041	403.125	10.9586	-7.08385
84	406	406.35	406.926	-0.35	-0.57576	407	396.014	402.922	10.9859	-6.90833
85	406	406.266	406.759	-0.26635	-0.49297	407	395.996	402.733	11.0043	-6.73754
86	406	406.202	406.594	-0.20243	-0.392	407	395.985	402.571	11.0148	-6.58565
87	406	406.147	406.448	-0.1471	-0.301	407	395.978	402.435	11.0224	-6.45738
88	406	406.092	406.302	-0.09176	-0.21	407	395.983	402.323	11.0174	-6.34017
89	405	406.036	406.155	-1.03643	-0.119	407	395.988	402.231	11.012	-6.2427
90	405	405.981	406.009	-0.98109	-0.02801	406	395.2	402.113	10.7998	-6.91287

## Sheet: magnetization ratio
	N2				Air
temp	2000v	2500v	3000v		2000v	2500v	3000v
25				2000	--	--	--	2000
100	70	100	100	1633	70	100	100	1400
150	70	100	100	1017	70	100	100	1000
200	70	100	100	460	70	100	100	466
250	70	100	100	127	70	100	100	110
300	100	100	100	0	100	100	100	0
350	100	100	100	0	100	100	100	0
400	100	100	100	0	100	100	100	0

## Sheet: delta t
	Air			N2
temp	t1	t2	△t	t1	t2	△t
100	41	53	12	49	58	9
200	32	47	15	48	52	4
300	42	53	11	43	53	10
400	51	59	8	52	59	7
